# Supplementary material
Source: HighWire-hosted journal article supplement (https://esmoopen.bmj.com/content/3/3/e000335)
Supplement: inline-supplementary-material-1 [file inline-supplementary-material-1.pdf]

| Stage (TNM)    | Location of primary tumor | Mutated gene       | Metastatic site at diagnosis | Ki67 staining | Surgery         | Adjuvant treatment | Site of relapse | Treatment for metastatic disease |
|----------------|---------------------------|--------------------|------------------------------|---------------|-----------------|--------------------|-----------------|----------------------------------|
| <b>T4N0M0</b>  | Stomach                   | <i>KIT, BRAF</i>   | None                         | 2-20%         | Yes             | Imatinib           | Liver           | Sunitinib                        |
| <b>T2N0M1</b>  | N/A                       | <i>KIT</i>         | Liver                        | 2-20%         | Excision biopsy | _                  | _               | Imatinib                         |
| <b>T4N0M0</b>  | Stomach                   | <i>KIT</i>         | None                         | >20%          | Yes             | _                  | Liver           | Imatinib                         |
| <b>T3N0M0</b>  | Small intestine           | <i>KIT, FGFR3</i>  | None                         | 2-20%         | Yes             | Imatinib           | No              | _                                |
| <b>T4N0M0</b>  | Stomach                   | <i>No mutation</i> | None                         | 2-20%         | Yes             | imatinib           | No              | _                                |
| <b>T4NxM1</b>  | N/A                       | <i>KIT</i>         | Peritoneum                   | >20%          | No              | _                  | No              | Imatinib                         |
| <b>T2N0M0</b>  | Stomach                   | <i>PDGFRA</i>      | None                         | <2%           | Yes             | Imatinib           | No              | _                                |
| <b>T3NxM0</b>  | Small intestine           | <i>KIT</i>         | None                         | 2-20%         | Yes             | Imatinib           | No              | _                                |
| <b>pT2NxM0</b> | Stomach                   | <i>KIT</i>         | None                         | 2-20%         | Yes             | imatinib           | Liver, pancreas | Sunitinib                        |
| <b>pT3N0M0</b> | Stomach                   | <i>KIT</i>         | None                         | 2-20%         | Yes             | Imatinib           | No              | _                                |
| <b>T2NXM1</b>  | Stomach                   | <i>KIT</i>         | Liver                        | >20%          | Yes             | _                  | _               | Imatinib                         |
| <b>T3NxM1</b>  | Stomach                   | <i>No mutation</i> | Liver                        | <2%           | Yes             | _                  | _               | Imatinib                         |
| <b>T4NxM1</b>  | Stomach                   | <i>PIK3CA</i>      | Bulky locoregional disease   | >20%          | Yes             | _                  | Locoregional    | Imatinib                         |
| <b>N/A</b>     | Anus                      | <i>KIT</i>         | None                         | <2%           | Yes             | _                  | No              | _                                |
| <b>pT2NxM0</b> | Stomach                   | <i>PDGFRA</i>      | None                         | <2%           | Yes             | _                  | No              | _                                |
| <b>T3NxM0</b>  | Stomach                   | <i>PDGFRA</i>      | None                         | 2-20%         | Yes             | Imatinib           | No              | _                                |
| <b>T3NxM0</b>  | Stomach                   | <i>PDGFRA</i>      | None                         | 2-20%         | Yes             | Imatinib           | No              | _                                |
| <b>T3NxM0</b>  | Small intestine           | <i>KIT</i>         | None                         | <2%           | Yes             | _                  | No              | _                                |
| <b>T2NxM0</b>  | Duodenum                  | <i>KIT</i>         | None                         | 2-20%         | Yes             | _                  | No              | _                                |
| <b>T3NxM0</b>  | Small intestine           | <i>KIT</i>         | None                         | 2-20%         | Yes             | Imatinib           | No              | _                                |
| <b>T3NxM0</b>  | Stomach                   | <i>PDGFRA</i>      | None                         | 2-20%         | Yes             | _                  | No              | _                                |

|                |                 |                    |                      |       |     |                   |                   |                   |
|----------------|-----------------|--------------------|----------------------|-------|-----|-------------------|-------------------|-------------------|
| <b>T3NxM0</b>  | Stomach         | <i>KIT</i>         | None                 | 2-20% | Yes | imatinib          | No                | -                 |
| <b>T4NxM0</b>  | Stomach         | <i>PDGFRA</i>      | None                 | 2-20% | yes | -                 | No                | -                 |
| <b>T2NxM0</b>  | Rectum          | <i>KIT</i>         | None                 | 2-20% | Yes | -                 | Liver,<br>rectum  | Imatinib          |
| <b>T3NxM0</b>  | Colon           | <i>KIT</i>         | None                 | 2-20% | Yes | Imatinib          | Liver,<br>Lung    | Imatinib          |
| <b>T3NxM0</b>  | Stomach         | <i>KIT</i>         | None                 | 2-20% | Yes | -                 | No                | -                 |
| <b>T3NxM0</b>  | Small intestine | <i>No mutation</i> | None                 | <2%   | Yes | -                 | No                | -                 |
| <b>T4NxM1</b>  | N/A             | <i>KIT</i>         | Liver,<br>Peritoneum | <2%   | No  | -                 | -                 | Imatinib          |
| <b>T3NxM0</b>  | Stomach         | <i>PDGFRA</i>      | None                 | 2-20% | Yes | -                 | No                | -                 |
| <b>PT4NxM0</b> | Stomach         | <i>No mutation</i> | None                 | 2-20% | Yes | -                 | No                | -                 |
| <b>pT2NxM0</b> | Stomach         | <i>KIT</i>         | None                 | 2-20% | Yes | follow-up<br>lost | follow-up<br>lost | follow-up<br>lost |
| <b>T3NxM0</b>  | Stomach         | <i>No mutation</i> | None                 | <2%   | Yes | -                 | -                 | -                 |
| <b>T3NxM0</b>  | Duodenum        | <i>KIT</i>         | None                 | <2%   | Yes | -                 | Liver             | Imatinib          |
| <b>T4NxM1</b>  | Small intestine | <i>KIT</i>         | Liver                | >20%  | Yes | -                 | -                 | Imatinib          |
| <b>T4NxM0</b>  | Stomach         | <i>KIT</i>         | None                 | 2-20% | Yes | Imatinib          | No                | -                 |
| <b>T3NxM0</b>  | Stomach         | <i>KIT</i>         | None                 | >20%  | Yes | Imatinib          | No                | -                 |
| <b>T3NxM0</b>  | Stomach         | <i>KIT</i>         | None                 | 2-20% | Yes | -                 | No                | -                 |
| <b>T3N1M0</b>  | Stomach         | <i>KRAS</i>        | None                 | >20%  | Yes | -                 | stomach           | Imatinib          |

**Supplementary Table 1. Clinicopathological and molecular data of 38 patients with GIST.** Case by case illustration of TNM staging, location of primary tumor and metastatic site, mutated gene, Ki67 immunostaining and treatment-related data such as surgery and systematic treatment. N/A denotes not available. The dash symbol (-) denotes not applicable.
